# Supplementary material for: Insulin-stimulated glucose uptake in skeletal muscle, adipose tissue and liver: a positron emission tomography study
Source: PubMed Central journal article supplement (PMC5920018; doi:10.1530/eje-17-0882), 2018-03-07
Supplement: eje-178-523-t002.pdf [file eje-178-523-t002.pdf]

1 Supplementary table 2. Principal component analysis. Loadings in men and women indicate the contribution of each variable (GU=glucose  
 2 uptake)  
 3 to principal components (PC1, PC2, PC3). Liver GU was replaced by endogenous glucose production (EGP).

| <b>Model 1</b>                           | Men    |        | Women  |        | All    |        |        |
|------------------------------------------|--------|--------|--------|--------|--------|--------|--------|
|                                          | PC1    | PC2    | PC1    | PC2    | PC1    | PC2    | PC3    |
| GU/EGP ( $\mu\text{mol/kg tissue/min}$ ) |        |        |        |        |        |        |        |
| Age (years)                              | -0.226 | 0.796  | 0.848  | 0.280  | 0.868  | 0.121  | -0.133 |
| Body mass index (kg/m <sup>2</sup> )     | -0.890 | -0.155 | -0.930 | -0.172 | -0.352 | -0.803 | 0.291  |
| Gender                                   | -      | -      | -      | -      | 0.619  | -0.274 | 0.575  |
| Skeletal muscle GU                       | 0.854  | -0.228 | 0.739  | -0.352 | 0.038  | 0.893  | 0.235  |
| Intraperitoneal adipose<br>tissue GU     | 0.375  | 0.758  | 0.856  | -0.131 | 0.799  | 0.340  | 0.048  |
| EGP                                      | -0.048 | 0.605  | 0.031  | 0.954  | 0.089  | -0.105 | -0.909 |
| Variance explained                       | 34%    | 33%    | 57%    | 23%    | 31%    | 28%    | 22%    |

4

5
